# Supplementary material for: Model-based contextualization of in vitro toxicity data quantitatively predicts in vivo drug response in patients
Source: PubMed Central journal article supplement (PMC5306109; doi:10.1007/s00204-016-1723-x), 2016-05-09
Supplement: 204_2016_1723_MOESM1_ESM.pdf [file 204_2016_1723_MOESM1_ESM.pdf]

| Species | Category | Term ID    | Term name                                           | Treatment     | P-value    |
|---------|----------|------------|-----------------------------------------------------|---------------|------------|
| Human   | KEGG     | hsa00240   | Pyrimidine metabolism                               | Low - 24 h    | 0.0001855  |
| Human   | KEGG     | hsa00982   | Drug metabolism - cytochrome P450                   | Low - 24 h    | 0.00018996 |
| Human   | KEGG     | hsa03030   | DNA replication                                     | Low - 24 h    | 1.10E-07   |
| Human   | KEGG     | hsa04110   | Cell cycle                                          | Low - 24 h    | 1.25E-16   |
| Human   | KEGG     | hsa04114   | Oocyte meiosis                                      | Low - 24 h    | 1.44E-05   |
| Human   | KEGG     | hsa04115   | p53 signaling pathway                               | Low - 24 h    | 4.98E-07   |
| Human   | KEGG     | hsa00830   | Retinol metabolism                                  | Middle - 24 h | 3.84E-05   |
| Human   | KEGG     | hsa03030   | DNA replication                                     | Middle - 24 h | 1.59E-12   |
| Human   | KEGG     | hsa03420   | Nucleotide excision repair                          | Middle - 24 h | 5.47E-05   |
| Human   | KEGG     | hsa03430   | Mismatch repair                                     | Middle - 24 h | 4.99E-07   |
| Human   | KEGG     | hsa03460   | Fanconi anemia pathway                              | Middle - 24 h | 2.99E-05   |
| Human   | KEGG     | hsa04110   | Cell cycle                                          | Middle - 24 h | 2.62E-17   |
| Human   | KEGG     | hsa04115   | p53 signaling pathway                               | Middle - 24 h | 4.83E-07   |
| Human   | KEGG     | hsa04141   | Protein processing in endoplasmic reticulum         | Middle - 24 h | 1.41E-05   |
| Human   | KEGG     | hsa05202   | Transcriptional misregulation in cancer             | Middle - 24 h | 0.00011211 |
| Human   | KEGG     | hsa04068   | FoxO signaling pathway                              | High - 8 h    | 8.96E-07   |
| Human   | KEGG     | hsa04110   | Cell cycle                                          | High - 8 h    | 1.87E-06   |
| Human   | KEGG     | hsa04115   | p53 signaling pathway                               | High - 8 h    | 3.66E-05   |
| Human   | KEGG     | hsa00240   | Pyrimidine metabolism                               | High - 24 h   | 0.00012092 |
| Human   | KEGG     | hsa03030   | DNA replication                                     | High - 24 h   | 2.92E-12   |
| Human   | KEGG     | hsa03430   | Mismatch repair                                     | High - 24 h   | 2.98E-05   |
| Human   | KEGG     | hsa03460   | Fanconi anemia pathway                              | High - 24 h   | 4.33E-05   |
| Human   | KEGG     | hsa04110   | Cell cycle                                          | High - 24 h   | 2.43E-15   |
| Human   | KEGG     | hsa04115   | p53 signaling pathway                               | High - 24 h   | 3.20E-05   |
| Human   | KEGG     | hsa04141   | Protein processing in endoplasmic reticulum         | High - 24 h   | 1.06E-08   |
| Human   | TOX      | TOX:04     | DNA Damage & Repair                                 | Low - 24 h    | 4.86E-06   |
| Human   | TOX      | TOX:08     | Immunotoxicity                                      | Low - 24 h    | 0.00026011 |
| Human   | TOX      | TOX:02     | Cholestasis                                         | Middle - 8 h  | 0.0032688  |
| Human   | TOX      | TOX:04     | DNA Damage & Repair                                 | Middle - 24 h | 4.45E-09   |
| Human   | TOX      | TOX:08     | Immunotoxicity                                      | Middle - 24 h | 0.00087295 |
| Human   | TOX      | TOX:11     | Oxidative Stress & Antioxidant Response             | Middle - 24 h | 0.0016711  |
| Human   | TOX      | TOX:07     | Heat Shock Response                                 | High - 8 h    | 8.55E-05   |
| Human   | TOX      | TOX:04     | DNA Damage & Repair                                 | High - 24 h   | 5.10E-07   |
| Human   | TOX      | TOX:05     | ER Stress & Unfolded Protein Response               | High - 24 h   | 0.00062041 |
| Human   | TOX      | TOX:07     | Heat Shock Response                                 | High - 24 h   | 0.00031518 |
| Human   | TOX      | TOX:08     | Immunotoxicity                                      | High - 24 h   | 0.0038211  |
| Human   | TOX      | TOX:11     | Oxidative Stress & Antioxidant Response             | High - 24 h   | 0.0049039  |
| Human   | TOX      | TOX:12     | Phospholipidosis                                    | High - 24 h   | 0.0014279  |
| Human   | GO (BP)  | GO:0007091 | metaphase/anaphase transition of mitotic cell cycle | Low - 24 h    | 1.16E-10   |

| Species | Category | Term ID    | Term name                                                                      | Treatment     | P-value    |
|---------|----------|------------|--------------------------------------------------------------------------------|---------------|------------|
| Human   | GO (BP)  | GO:0006271 | DNA strand elongation involved in DNA replication                              | Low - 24 h    | 1.42E-09   |
| Human   | GO (BP)  | GO:0034080 | CENP-A containing nucleosome assembly                                          | Low - 24 h    | 6.04E-08   |
| Human   | GO (BP)  | GO:0051988 | regulation of attachment of spindle microtubules to kinetochore                | Low - 24 h    | 9.93E-08   |
| Human   | GO (BP)  | GO:0006206 | pyrimidine nucleobase metabolic process                                        | Low - 24 h    | 1.80E-07   |
| Human   | GO (BP)  | GO:0007076 | mitotic chromosome condensation                                                | Low - 24 h    | 7.54E-07   |
| Human   | GO (BP)  | GO:0007094 | mitotic spindle assembly checkpoint                                            | Low - 24 h    | 8.99E-07   |
| Human   | GO (BP)  | GO:0008608 | attachment of spindle microtubules to kinetochore                              | Low - 24 h    | 1.20E-06   |
| Human   | GO (BP)  | GO:0000086 | G2/M transition of mitotic cell cycle                                          | Low - 24 h    | 1.48E-06   |
| Human   | GO (BP)  | GO:0042493 | response to drug                                                               | Low - 24 h    | 2.09E-06   |
| Human   | GO (BP)  | GO:0045132 | meiotic chromosome segregation                                                 | Low - 24 h    | 2.42E-06   |
| Human   | GO (BP)  | GO:0006084 | acetyl-CoA metabolic process                                                   | Low - 24 h    | 1.33E-05   |
| Human   | GO (BP)  | GO:0007100 | mitotic centrosome separation                                                  | Low - 24 h    | 2.14E-05   |
| Human   | GO (BP)  | GO:0008283 | cell proliferation                                                             | Low - 24 h    | 3.28E-05   |
| Human   | GO (BP)  | GO:0055114 | oxidation-reduction process                                                    | Low - 24 h    | 3.46E-05   |
| Human   | GO (BP)  | GO:0006200 | ATP catabolic process                                                          | Low - 24 h    | 3.64E-05   |
| Human   | GO (BP)  | GO:1901606 | alpha-amino acid catabolic process                                             | Low - 24 h    | 4.91E-05   |
| Human   | GO (BP)  | GO:0007131 | reciprocal meiotic recombination                                               | Low - 24 h    | 5.97E-05   |
| Human   | GO (BP)  | GO:0009411 | response to UV                                                                 | Low - 24 h    | 7.00E-05   |
| Human   | GO (BP)  | GO:0007018 | microtubule-based movement                                                     | Low - 24 h    | 7.17E-05   |
| Human   | GO (BP)  | GO:0015949 | nucleobase-containing small molecule interconversion                           | Low - 24 h    | 8.60E-05   |
| Human   | GO (BP)  | GO:0009636 | response to toxic substance                                                    | Low - 24 h    | 9.46E-05   |
| Human   | GO (BP)  | GO:0031570 | DNA integrity checkpoint                                                       | Low - 24 h    | 0.00011555 |
| Human   | GO (BP)  | GO:0090399 | replicative senescence                                                         | Low - 24 h    | 0.00011972 |
| Human   | GO (BP)  | GO:0000910 | cytokinesis                                                                    | Low - 24 h    | 0.00016247 |
| Human   | GO (BP)  | GO:0006270 | DNA replication initiation                                                     | Low - 24 h    | 0.00017279 |
| Human   | GO (BP)  | GO:0009437 | carnitine metabolic process                                                    | Low - 24 h    | 0.0001839  |
| Human   | GO (BP)  | GO:0051382 | kinetochore assembly                                                           | Low - 24 h    | 0.00026965 |
| Human   | GO (BP)  | GO:0090068 | positive regulation of cell cycle process                                      | Low - 24 h    | 0.00031613 |
| Human   | GO (BP)  | GO:0006366 | transcription from RNA polymerase II promoter                                  | Middle - 8 h  | 7.37E-07   |
| Human   | GO (BP)  | GO:0031016 | pancreas development                                                           | Middle - 8 h  | 4.88E-06   |
| Human   | GO (BP)  | GO:0060412 | ventricular septum morphogenesis                                               | Middle - 8 h  | 1.59E-05   |
| Human   | GO (BP)  | GO:0006271 | DNA strand elongation involved in DNA replication                              | Middle - 24 h | 4.43E-13   |
| Human   | GO (BP)  | GO:0034080 | CENP-A containing nucleosome assembly                                          | Middle - 24 h | 6.75E-12   |
| Human   | GO (BP)  | GO:0007091 | metaphase/anaphase transition of mitotic cell cycle                            | Middle - 24 h | 5.31E-09   |
| Human   | GO (BP)  | GO:0008283 | cell proliferation                                                             | Middle - 24 h | 2.30E-08   |
| Human   | GO (BP)  | GO:0007076 | mitotic chromosome condensation                                                | Middle - 24 h | 9.58E-08   |
| Human   | GO (BP)  | GO:0006987 | activation of signaling protein activity involved in unfolded protein response | Middle - 24 h | 2.03E-07   |
| Human   | GO (BP)  | GO:0000083 | regulation of transcription involved in G1/S transition of mitotic cell cycle  | Middle - 24 h | 2.82E-07   |
| Human   | GO (BP)  | GO:0006270 | DNA replication initiation                                                     | Middle - 24 h | 3.35E-07   |

| Species | Category | Term ID    | Term name                                                       | Treatment     | P-value    |
|---------|----------|------------|-----------------------------------------------------------------|---------------|------------|
| Human   | GO (BP)  | GO:0008608 | attachment of spindle microtubules to kinetochore               | Middle - 24 h | 8.49E-07   |
| Human   | GO (BP)  | GO:0031100 | organ regeneration                                              | Middle - 24 h | 9.09E-07   |
| Human   | GO (BP)  | GO:0032201 | telomere maintenance via semi-conservative replication          | Middle - 24 h | 3.24E-06   |
| Human   | GO (BP)  | GO:0007094 | mitotic spindle assembly checkpoint                             | Middle - 24 h | 4.88E-06   |
| Human   | GO (BP)  | GO:0051988 | regulation of attachment of spindle microtubules to kinetochore | Middle - 24 h | 5.33E-06   |
| Human   | GO (BP)  | GO:0000722 | telomere maintenance via recombination                          | Middle - 24 h | 7.00E-06   |
| Human   | GO (BP)  | GO:0007080 | mitotic metaphase plate congression                             | Middle - 24 h | 7.44E-06   |
| Human   | GO (BP)  | GO:0000910 | cytokinesis                                                     | Middle - 24 h | 1.10E-05   |
| Human   | GO (BP)  | GO:0070365 | hepatocyte differentiation                                      | Middle - 24 h | 1.12E-05   |
| Human   | GO (BP)  | GO:0051382 | kinetochore assembly                                            | Middle - 24 h | 2.13E-05   |
| Human   | GO (BP)  | GO:0045132 | meiotic chromosome segregation                                  | Middle - 24 h | 2.20E-05   |
| Human   | GO (BP)  | GO:0007019 | microtubule depolymerization                                    | Middle - 24 h | 2.61E-05   |
| Human   | GO (BP)  | GO:0014070 | response to organic cyclic compound                             | Middle - 24 h | 2.63E-05   |
| Human   | GO (BP)  | GO:0006302 | double-strand break repair                                      | Middle - 24 h | 4.12E-05   |
| Human   | GO (BP)  | GO:0006206 | pyrimidine nucleobase metabolic process                         | Middle - 24 h | 4.63E-05   |
| Human   | GO (BP)  | GO:0006297 | nucleotide-excision repair, DNA gap filling                     | Middle - 24 h | 4.77E-05   |
| Human   | GO (BP)  | GO:0046394 | carboxylic acid biosynthetic process                            | Middle - 24 h | 4.80E-05   |
| Human   | GO (BP)  | GO:0007584 | response to nutrient                                            | Middle - 24 h | 6.01E-05   |
| Human   | GO (BP)  | GO:0000086 | G2/M transition of mitotic cell cycle                           | Middle - 24 h | 6.59E-05   |
| Human   | GO (BP)  | GO:0090307 | spindle assembly involved in mitosis                            | Middle - 24 h | 9.96E-05   |
| Human   | GO (BP)  | GO:0006283 | transcription-coupled nucleotide-excision repair                | Middle - 24 h | 0.0001042  |
| Human   | GO (BP)  | GO:0016572 | histone phosphorylation                                         | Middle - 24 h | 0.00010875 |
| Human   | GO (BP)  | GO:0006268 | DNA unwinding involved in DNA replication                       | Middle - 24 h | 0.00010983 |
| Human   | GO (BP)  | GO:0009411 | response to UV                                                  | Middle - 24 h | 0.00013072 |
| Human   | GO (BP)  | GO:0071281 | cellular response to iron ion                                   | Middle - 24 h | 0.00013533 |
| Human   | GO (BP)  | GO:1901606 | alpha-amino acid catabolic process                              | Middle - 24 h | 0.00013547 |
| Human   | GO (BP)  | GO:0006084 | acetyl-CoA metabolic process                                    | Middle - 24 h | 0.00014285 |
| Human   | GO (BP)  | GO:0006200 | ATP catabolic process                                           | Middle - 24 h | 0.00014961 |
| Human   | GO (BP)  | GO:0071479 | cellular response to ionizing radiation                         | Middle - 24 h | 0.00015656 |
| Human   | GO (BP)  | GO:0009200 | deoxyribonucleoside triphosphate metabolic process              | Middle - 24 h | 0.00022348 |
| Human   | GO (BP)  | GO:0015949 | nucleobase-containing small molecule interconversion            | Middle - 24 h | 0.00022348 |
| Human   | GO (BP)  | GO:0008630 | intrinsic apoptotic signaling pathway in response to DNA damage | Middle - 24 h | 0.00024137 |
| Human   | GO (BP)  | GO:0043065 | positive regulation of apoptotic process                        | Middle - 24 h | 0.00029346 |
| Human   | GO (BP)  | GO:0010332 | response to gamma radiation                                     | Middle - 24 h | 0.00030114 |
| Human   | GO (BP)  | GO:0007100 | mitotic centrosome separation                                   | Middle - 24 h | 0.00030171 |
| Human   | GO (BP)  | GO:0051255 | spindle midzone assembly                                        | Middle - 24 h | 0.00030171 |
| Human   | GO (BP)  | GO:0060236 | regulation of mitotic spindle organization                      | Middle - 24 h | 0.00030171 |
| Human   | GO (BP)  | GO:0045765 | regulation of angiogenesis                                      | Middle - 24 h | 0.00030212 |
| Human   | GO (BP)  | GO:0040001 | establishment of mitotic spindle localization                   | Middle - 24 h | 0.00031938 |

| Species | Category | Term ID    | Term name                                                                        | Treatment     | P-value    |
|---------|----------|------------|----------------------------------------------------------------------------------|---------------|------------|
| Human   | GO (BP)  | GO:0070301 | cellular response to hydrogen peroxide                                           | Middle - 24 h | 0.00036094 |
| Human   | GO (BP)  | GO:0000725 | recombinational repair                                                           | Middle - 24 h | 0.000415   |
| Human   | GO (BP)  | GO:0008283 | cell proliferation                                                               | High - 8 h    | 1.78E-06   |
| Human   | GO (BP)  | GO:0006366 | transcription from RNA polymerase II promoter                                    | High - 8 h    | 3.23E-06   |
| Human   | GO (BP)  | GO:0033993 | response to lipid                                                                | High - 8 h    | 7.54E-06   |
| Human   | GO (BP)  | GO:0045736 | negative regulation of cyclin-dependent protein serine/threonine kinase activity | High - 8 h    | 7.98E-06   |
| Human   | GO (BP)  | GO:0014070 | response to organic cyclic compound                                              | High - 8 h    | 1.96E-05   |
| Human   | GO (BP)  | GO:0009725 | response to hormone                                                              | High - 8 h    | 7.34E-05   |
| Human   | GO (BP)  | GO:0031016 | pancreas development                                                             | High - 8 h    | 7.59E-05   |
| Human   | GO (BP)  | GO:0045944 | positive regulation of transcription from RNA polymerase II promoter             | High - 8 h    | 7.98E-05   |
| Human   | GO (BP)  | GO:0060412 | ventricular septum morphogenesis                                                 | High - 8 h    | 9.00E-05   |
| Human   | GO (BP)  | GO:0090009 | primitive streak formation                                                       | High - 8 h    | 0.00010067 |
| Human   | GO (BP)  | GO:0008285 | negative regulation of cell proliferation                                        | High - 8 h    | 0.00010913 |
| Human   | GO (BP)  | GO:0048872 | homeostasis of number of cells                                                   | High - 8 h    | 0.00012165 |
| Human   | GO (BP)  | GO:0060537 | muscle tissue development                                                        | High - 8 h    | 0.00019426 |
| Human   | GO (BP)  | GO:0048661 | positive regulation of smooth muscle cell proliferation                          | High - 8 h    | 0.00019805 |
| Human   | GO (BP)  | GO:0070647 | protein modification by small protein conjugation or removal                     | High - 8 h    | 0.0002139  |
| Human   | GO (BP)  | GO:0055088 | lipid homeostasis                                                                | High - 8 h    | 0.0002197  |
| Human   | GO (BP)  | GO:0030518 | intracellular steroid hormone receptor signaling pathway                         | High - 8 h    | 0.00026118 |
| Human   | GO (BP)  | GO:0070848 | response to growth factor                                                        | High - 8 h    | 0.00026479 |
| Human   | GO (BP)  | GO:0006271 | DNA strand elongation involved in DNA replication                                | High - 24 h   | 1.12E-12   |
| Human   | GO (BP)  | GO:0034080 | CENP-A containing nucleosome assembly                                            | High - 24 h   | 1.12E-10   |
| Human   | GO (BP)  | GO:0006987 | activation of signaling protein activity involved in unfolded protein response   | High - 24 h   | 2.42E-08   |
| Human   | GO (BP)  | GO:0006270 | DNA replication initiation                                                       | High - 24 h   | 3.57E-07   |
| Human   | GO (BP)  | GO:0007076 | mitotic chromosome condensation                                                  | High - 24 h   | 5.39E-07   |
| Human   | GO (BP)  | GO:0007091 | metaphase/anaphase transition of mitotic cell cycle                              | High - 24 h   | 7.41E-07   |
| Human   | GO (BP)  | GO:0000086 | G2/M transition of mitotic cell cycle                                            | High - 24 h   | 1.86E-06   |
| Human   | GO (BP)  | GO:0000083 | regulation of transcription involved in G1/S transition of mitotic cell cycle    | High - 24 h   | 2.21E-06   |
| Human   | GO (BP)  | GO:0032201 | telomere maintenance via semi-conservative replication                           | High - 24 h   | 2.21E-06   |
| Human   | GO (BP)  | GO:1901606 | alpha-amino acid catabolic process                                               | High - 24 h   | 3.21E-06   |
| Human   | GO (BP)  | GO:0000722 | telomere maintenance via recombination                                           | High - 24 h   | 5.25E-06   |
| Human   | GO (BP)  | GO:0008608 | attachment of spindle microtubules to kinetochore                                | High - 24 h   | 5.45E-06   |
| Human   | GO (BP)  | GO:0015949 | nucleobase-containing small molecule interconversion                             | High - 24 h   | 7.90E-06   |
| Human   | GO (BP)  | GO:0007584 | response to nutrient                                                             | High - 24 h   | 1.09E-05   |
| Human   | GO (BP)  | GO:0040001 | establishment of mitotic spindle localization                                    | High - 24 h   | 1.33E-05   |
| Human   | GO (BP)  | GO:0042493 | response to drug                                                                 | High - 24 h   | 1.84E-05   |
| Human   | GO (BP)  | GO:0051988 | regulation of attachment of spindle microtubules to kinetochore                  | High - 24 h   | 1.94E-05   |
| Human   | GO (BP)  | GO:0060236 | regulation of mitotic spindle organization                                       | High - 24 h   | 3.15E-05   |
| Human   | GO (BP)  | GO:0007080 | mitotic metaphase plate congression                                              | High - 24 h   | 3.22E-05   |

| Species | Category | Term ID    | Term name                                                   | Treatment   | P-value    |
|---------|----------|------------|-------------------------------------------------------------|-------------|------------|
| Human   | GO (BP)  | GO:0007094 | mitotic spindle assembly checkpoint                         | High - 24 h | 4.01E-05   |
| Human   | GO (BP)  | GO:0006206 | pyrimidine nucleobase metabolic process                     | High - 24 h | 4.33E-05   |
| Human   | GO (BP)  | GO:0006200 | ATP catabolic process                                       | High - 24 h | 4.50E-05   |
| Human   | GO (BP)  | GO:0031100 | organ regeneration                                          | High - 24 h | 5.62E-05   |
| Human   | GO (BP)  | GO:0051382 | kinetochore assembly                                        | High - 24 h | 7.56E-05   |
| Human   | GO (BP)  | GO:0055114 | oxidation-reduction process                                 | High - 24 h | 8.31E-05   |
| Human   | GO (BP)  | GO:0000910 | cytokinesis                                                 | High - 24 h | 8.57E-05   |
| Human   | GO (BP)  | GO:0008283 | cell proliferation                                          | High - 24 h | 9.44E-05   |
| Human   | GO (BP)  | GO:0045132 | meiotic chromosome segregation                              | High - 24 h | 0.00010895 |
| Human   | GO (BP)  | GO:0007019 | microtubule depolymerization                                | High - 24 h | 0.00014913 |
| Human   | GO (BP)  | GO:0046394 | carboxylic acid biosynthetic process                        | High - 24 h | 0.00015846 |
| Human   | GO (BP)  | GO:0006297 | nucleotide-excision repair, DNA gap filling                 | High - 24 h | 0.00019643 |
| Human   | GO (BP)  | GO:0006081 | cellular aldehyde metabolic process                         | High - 24 h | 0.00021462 |
| Human   | GO (BP)  | GO:0071479 | cellular response to ionizing radiation                     | High - 24 h | 0.00021462 |
| Human   | GO (BP)  | GO:0030433 | ER-associated ubiquitin-dependent protein catabolic process | High - 24 h | 0.00021546 |
| Human   | GO (BP)  | GO:0090068 | positive regulation of cell cycle process                   | High - 24 h | 0.00030154 |
| Human   | GO (BP)  | GO:0006268 | DNA unwinding involved in DNA replication                   | High - 24 h | 0.00031637 |
| Human   | GO (BP)  | GO:0009157 | deoxyribonucleoside monophosphate biosynthetic process      | High - 24 h | 0.00032348 |
| Human   | GO (BP)  | GO:0009221 | pyrimidine deoxyribonucleotide biosynthetic process         | High - 24 h | 0.00032348 |
| Human   | GO (BP)  | GO:0071281 | cellular response to iron ion                               | High - 24 h | 0.00032348 |
| Human   | GO (BP)  | GO:0090307 | spindle assembly involved in mitosis                        | High - 24 h | 0.00034088 |
| Human   | GO (BP)  | GO:0042060 | wound healing                                               | High - 24 h | 0.00034532 |
| Human   | GO (CC)  | GO:0032993 | protein-DNA complex                                         | Low - 24 h  | 6.19E-17   |
| Human   | GO (CC)  | GO:0000922 | spindle pole                                                | Low - 24 h  | 1.28E-12   |
| Human   | GO (CC)  | GO:0005829 | cytosol                                                     | Low - 24 h  | 7.53E-11   |
| Human   | GO (CC)  | GO:0030496 | midbody                                                     | Low - 24 h  | 1.31E-08   |
| Human   | GO (CC)  | GO:0005654 | nucleoplasm                                                 | Low - 24 h  | 8.27E-08   |
| Human   | GO (CC)  | GO:0005876 | spindle microtubule                                         | Low - 24 h  | 2.18E-07   |
| Human   | GO (CC)  | GO:0072686 | mitotic spindle                                             | Low - 24 h  | 2.68E-07   |
| Human   | GO (CC)  | GO:0000778 | condensed nuclear chromosome kinetochore                    | Low - 24 h  | 3.33E-07   |
| Human   | GO (CC)  | GO:0005871 | kinesin complex                                             | Low - 24 h  | 6.06E-06   |
| Human   | GO (CC)  | GO:0000796 | condensin complex                                           | Low - 24 h  | 8.61E-06   |
| Human   | GO (CC)  | GO:0000940 | condensed chromosome outer kinetochore                      | Low - 24 h  | 1.12E-05   |
| Human   | GO (CC)  | GO:0051233 | spindle midzone                                             | Low - 24 h  | 1.74E-05   |
| Human   | GO (CC)  | GO:0005813 | centrosome                                                  | Low - 24 h  | 4.51E-05   |
| Human   | GO (CC)  | GO:0042555 | MCM complex                                                 | Low - 24 h  | 0.00011022 |
| Human   | GO (CC)  | GO:0008278 | cohesin complex                                             | Low - 24 h  | 0.00016939 |
| Human   | GO (CC)  | GO:0005730 | nucleolus                                                   | Low - 24 h  | 0.00020934 |
| Human   | GO (CC)  | GO:0035371 | microtubule plus-end                                        | Low - 24 h  | 0.00064107 |

| Species | Category | Term ID    | Term name                                | Treatment     | P-value    |
|---------|----------|------------|------------------------------------------|---------------|------------|
| Human   | GO (CC)  | GO:0045120 | pronucleus                               | Low - 24 h    | 0.00083603 |
| Human   | GO (CC)  | GO:0032993 | protein-DNA complex                      | Middle - 24 h | 1.76E-21   |
| Human   | GO (CC)  | GO:0005654 | nucleoplasm                              | Middle - 24 h | 2.22E-12   |
| Human   | GO (CC)  | GO:0000922 | spindle pole                             | Middle - 24 h | 1.17E-11   |
| Human   | GO (CC)  | GO:0005829 | cytosol                                  | Middle - 24 h | 5.35E-10   |
| Human   | GO (CC)  | GO:0000796 | condensin complex                        | Middle - 24 h | 2.70E-08   |
| Human   | GO (CC)  | GO:0030496 | midbody                                  | Middle - 24 h | 1.53E-07   |
| Human   | GO (CC)  | GO:0000778 | condensed nuclear chromosome kinetochore | Middle - 24 h | 1.80E-07   |
| Human   | GO (CC)  | GO:0005876 | spindle microtubule                      | Middle - 24 h | 2.98E-07   |
| Human   | GO (CC)  | GO:0000940 | condensed chromosome outer kinetochore   | Middle - 24 h | 9.16E-07   |
| Human   | GO (CC)  | GO:0005663 | DNA replication factor C complex         | Middle - 24 h | 2.84E-06   |
| Human   | GO (CC)  | GO:0042555 | MCM complex                              | Middle - 24 h | 4.69E-06   |
| Human   | GO (CC)  | GO:0072686 | mitotic spindle                          | Middle - 24 h | 9.32E-06   |
| Human   | GO (CC)  | GO:0005871 | kinesin complex                          | Middle - 24 h | 4.48E-05   |
| Human   | GO (CC)  | GO:0000785 | chromatin                                | Middle - 24 h | 0.00021058 |
| Human   | GO (CC)  | GO:0005788 | endoplasmic reticulum lumen              | Middle - 24 h | 0.0002234  |
| Human   | GO (CC)  | GO:0005813 | centrosome                               | Middle - 24 h | 0.00051081 |
| Human   | GO (CC)  | GO:0032300 | mismatch repair complex                  | Middle - 24 h | 0.00053004 |
| Human   | GO (CC)  | GO:0000407 | pre-autophagosomal structure             | Middle - 24 h | 0.00053852 |
| Human   | GO (CC)  | GO:0051233 | spindle midzone                          | Middle - 24 h | 0.00071916 |
| Human   | GO (CC)  | GO:0035371 | microtubule plus-end                     | Middle - 24 h | 0.00093564 |
| Human   | GO (CC)  | GO:0005654 | nucleoplasm                              | High - 8 h    | 1.40E-06   |
| Human   | GO (CC)  | GO:0032993 | protein-DNA complex                      | High - 24 h   | 5.80E-21   |
| Human   | GO (CC)  | GO:0000922 | spindle pole                             | High - 24 h   | 6.20E-11   |
| Human   | GO (CC)  | GO:0005829 | cytosol                                  | High - 24 h   | 8.18E-10   |
| Human   | GO (CC)  | GO:0000940 | condensed chromosome outer kinetochore   | High - 24 h   | 5.82E-09   |
| Human   | GO (CC)  | GO:0005654 | nucleoplasm                              | High - 24 h   | 2.02E-08   |
| Human   | GO (CC)  | GO:0005876 | spindle microtubule                      | High - 24 h   | 7.54E-08   |
| Human   | GO (CC)  | GO:0000796 | condensin complex                        | High - 24 h   | 1.02E-07   |
| Human   | GO (CC)  | GO:0030496 | midbody                                  | High - 24 h   | 1.10E-07   |
| Human   | GO (CC)  | GO:0000778 | condensed nuclear chromosome kinetochore | High - 24 h   | 6.69E-07   |
| Human   | GO (CC)  | GO:0070062 | extracellular vesicular exosome          | High - 24 h   | 6.20E-06   |
| Human   | GO (CC)  | GO:0005813 | centrosome                               | High - 24 h   | 7.40E-06   |
| Human   | GO (CC)  | GO:0005663 | DNA replication factor C complex         | High - 24 h   | 8.43E-06   |
| Human   | GO (CC)  | GO:0042555 | MCM complex                              | High - 24 h   | 1.68E-05   |
| Human   | GO (CC)  | GO:0005788 | endoplasmic reticulum lumen              | High - 24 h   | 0.00013482 |
| Human   | GO (CC)  | GO:0005871 | kinesin complex                          | High - 24 h   | 0.0003161  |
| Human   | GO (CC)  | GO:0072686 | mitotic spindle                          | High - 24 h   | 0.00035081 |
| Human   | GO (CC)  | GO:0032155 | cell division site part                  | High - 24 h   | 0.00051871 |



| Species | Category | Term ID    | Term name                                                          | Treatment     | P-value    |
|---------|----------|------------|--------------------------------------------------------------------|---------------|------------|
| Rat     | KEGG     | rno00051   | Fructose and mannose metabolism - Rattus norvegicus (rat)          | Middle - 24 h | 7.38E-05   |
| Rat     | KEGG     | rno00830   | Retinol metabolism - Rattus norvegicus (rat)                       | Middle - 24 h | 5.98E-05   |
| Rat     | KEGG     | rno04610   | Complement and coagulation cascades - Rattus norvegicus (rat)      | Middle - 24 h | 2.46E-06   |
| Rat     | KEGG     | rno00260   | Glycine, serine and threonine metabolism - Rattus norvegicus (rat) | High - 24 h   | 1.34E-08   |
| Rat     | KEGG     | rno04610   | Complement and coagulation cascades - Rattus norvegicus (rat)      | High - 24 h   | 2.30E-12   |
| Rat     | TOX      | TOX:04     | DNA Damage & Repair                                                | High - 8 h    | 0.00083009 |
| Rat     | GO (BP)  | GO:0055114 | oxidation-reduction process                                        | Middle - 24 h | 5.40E-08   |
| Rat     | GO (BP)  | GO:0006805 | xenobiotic metabolic process                                       | Middle - 24 h | 6.05E-06   |
| Rat     | GO (BP)  | GO:0017144 | drug metabolic process                                             | Middle - 24 h | 1.01E-05   |
| Rat     | GO (BP)  | GO:0010043 | response to zinc ion                                               | Middle - 24 h | 1.39E-05   |
| Rat     | GO (BP)  | GO:0006790 | sulfur compound metabolic process                                  | Middle - 24 h | 7.12E-05   |
| Rat     | GO (BP)  | GO:0001889 | liver development                                                  | Middle - 24 h | 8.44E-05   |
| Rat     | GO (BP)  | GO:0010468 | regulation of gene expression                                      | High - 8 h    | 8.90E-06   |
| Rat     | GO (BP)  | GO:0072395 | signal transduction involved in cell cycle checkpoint              | High - 8 h    | 2.23E-05   |
| Rat     | GO (BP)  | GO:0030330 | DNA damage response, signal transduction by p53 class mediator     | High - 8 h    | 2.67E-05   |
| Rat     | GO (BP)  | GO:2000112 | regulation of cellular macromolecule biosynthetic process          | High - 8 h    | 2.82E-05   |
| Rat     | GO (BP)  | GO:0019219 | regulation of nucleobase-containing compound metabolic process     | High - 8 h    | 3.00E-05   |
| Rat     | GO (BP)  | GO:0016070 | RNA metabolic process                                              | High - 8 h    | 4.43E-05   |
| Rat     | GO (BP)  | GO:0010467 | gene expression                                                    | High - 8 h    | 5.87E-05   |
| Rat     | GO (BP)  | GO:0055114 | oxidation-reduction process                                        | High - 24 h   | 5.09E-13   |
| Rat     | GO (BP)  | GO:0009071 | serine family amino acid catabolic process                         | High - 24 h   | 5.31E-07   |
| Rat     | GO (BP)  | GO:0032787 | monocarboxylic acid metabolic process                              | High - 24 h   | 1.82E-06   |
| Rat     | GO (BP)  | GO:0006958 | complement activation, classical pathway                           | High - 24 h   | 3.06E-06   |
| Rat     | GO (BP)  | GO:0006544 | glycine metabolic process                                          | High - 24 h   | 3.35E-06   |
| Rat     | GO (BP)  | GO:1901653 | cellular response to peptide                                       | High - 24 h   | 1.43E-05   |
| Rat     | GO (BP)  | GO:0001889 | liver development                                                  | High - 24 h   | 2.10E-05   |
| Rat     | GO (BP)  | GO:0006805 | xenobiotic metabolic process                                       | High - 24 h   | 2.43E-05   |
| Rat     | GO (BP)  | GO:0006006 | glucose metabolic process                                          | High - 24 h   | 2.62E-05   |
| Rat     | GO (BP)  | GO:0006695 | cholesterol biosynthetic process                                   | High - 24 h   | 3.76E-05   |
| Rat     | GO (BP)  | GO:0006733 | oxidoreduction coenzyme metabolic process                          | High - 24 h   | 4.55E-05   |
| Rat     | GO (BP)  | GO:0042632 | cholesterol homeostasis                                            | High - 24 h   | 4.74E-05   |
| Rat     | GO (BP)  | GO:0044724 | single-organism carbohydrate catabolic process                     | High - 24 h   | 5.51E-05   |
| Rat     | GO (BP)  | GO:0051289 | protein homotetramerization                                        | High - 24 h   | 6.92E-05   |
| Rat     | GO (BP)  | GO:0006790 | sulfur compound metabolic process                                  | High - 24 h   | 8.35E-05   |
| Rat     | GO (BP)  | GO:0009070 | serine family amino acid biosynthetic process                      | High - 24 h   | 8.37E-05   |
| Rat     | GO (BP)  | GO:0009074 | aromatic amino acid family catabolic process                       | High - 24 h   | 8.37E-05   |
| Rat     | GO (BP)  | GO:0072524 | pyridine-containing compound metabolic process                     | High - 24 h   | 9.02E-05   |
| Rat     | GO (BP)  | GO:0043434 | response to peptide hormone                                        | High - 24 h   | 9.23E-05   |
| Rat     | GO (BP)  | GO:0010878 | cholesterol storage                                                | High - 24 h   | 9.44E-05   |

| Species | Category | Term ID    | Term name                                                                              | Treatment     | P-value    |
|---------|----------|------------|----------------------------------------------------------------------------------------|---------------|------------|
| Rat     | GO (CC)  | GO:0005615 | extracellular space                                                                    | Middle - 24 h | 8.86E-05   |
| Rat     | GO (CC)  | GO:0005634 | nucleus                                                                                | High - 8 h    | 3.42E-06   |
| Rat     | GO (CC)  | GO:0070062 | extracellular vesicular exosome                                                        | High - 24 h   | 7.36E-07   |
| Rat     | GO (CC)  | GO:0005615 | extracellular space                                                                    | High - 24 h   | 0.00010594 |
| Rat     | GO (MF)  | GO:0005506 | iron ion binding                                                                       | Middle - 24 h | 4.35E-07   |
| Rat     | GO (MF)  | GO:0005543 | phospholipid binding                                                                   | Middle - 24 h | 5.16E-05   |
| Rat     | GO (MF)  | GO:0016712 | oxidoreductase activity, acting on paired donors, with incorporation or reduction of m | Middle - 24 h | 5.45E-05   |
| Rat     | GO (MF)  | GO:0030170 | pyridoxal phosphate binding                                                            | High - 24 h   | 2.92E-05   |
| Rat     | GO (MF)  | GO:0043546 | molybdopterin cofactor binding                                                         | High - 24 h   | 2.95E-05   |
