# Supplementary material for: Model-based contextualization of in vitro toxicity data quantitatively predicts in vivo drug response in patients
Source: PubMed Central journal article supplement (PMC5306109; doi:10.1007/s00204-016-1723-x), 2016-05-09
Supplement: 204_2016_1723_MOESM2_ESM.pdf [file 204_2016_1723_MOESM2_ESM.pdf]

| Term id    | Term name                                                                                                                                                                                   | r       | p         |
|------------|---------------------------------------------------------------------------------------------------------------------------------------------------------------------------------------------|---------|-----------|
| rno00830   | Retinol metabolism - Rattus norvegicus (rat)                                                                                                                                                | 0.80944 | 0.0014231 |
| GO:0005506 | iron ion binding                                                                                                                                                                            | 0.76305 | 0.0038891 |
| GO:0006805 | xenobiotic metabolic process                                                                                                                                                                | 0.75578 | 0.004464  |
| GO:0030170 | pyridoxal phosphate binding                                                                                                                                                                 | 0.70727 | 0.010094  |
| GO:0070062 | extracellular vesicular exosome                                                                                                                                                             | 0.68179 | 0.014604  |
| GO:0006790 | sulfur compound metabolic process                                                                                                                                                           | 0.6661  | 0.018033  |
| GO:0043546 | molybdopterin cofactor binding                                                                                                                                                              | 0.64673 | 0.023039  |
| GO:0001889 | liver development                                                                                                                                                                           | 0.63887 | 0.025333  |
| GO:0005634 | nucleus                                                                                                                                                                                     | 0.62866 | 0.028551  |
| GO:0010467 | gene expression                                                                                                                                                                             | 0.62233 | 0.030693  |
| GO:0006695 | cholesterol biosynthetic process                                                                                                                                                            | 0.62115 | 0.031104  |
| GO:0032787 | monocarboxylic acid metabolic process                                                                                                                                                       | 0.62    | 0.031508  |
| TOX:04     | DNA Damage & Repair                                                                                                                                                                         | 0.61959 | 0.031652  |
| GO:0055114 | oxidation-reduction process                                                                                                                                                                 | 0.61273 | 0.034153  |
| GO:0006006 | glucose metabolic process                                                                                                                                                                   | 0.60572 | 0.036853  |
| GO:0044724 | single-organism carbohydrate catabolic process                                                                                                                                              | 0.59561 | 0.041004  |
| GO:0016070 | RNA metabolic process                                                                                                                                                                       | 0.59471 | 0.04139   |
| GO:0051289 | protein homotetramerization                                                                                                                                                                 | 0.57735 | 0.049333  |
| rno04610   | Complement and coagulation cascades - Rattus norvegicus (rat)                                                                                                                               | 0.56126 | 0.057597  |
| GO:0043434 | response to peptide hormone                                                                                                                                                                 | 0.55167 | 0.062958  |
| GO:2000112 | regulation of cellular macromolecule biosynthetic process                                                                                                                                   | 0.53904 | 0.070532  |
| GO:0019219 | regulation of nucleobase-containing compound metabolic process                                                                                                                              | 0.53508 | 0.073032  |
| GO:1901653 | cellular response to peptide                                                                                                                                                                | 0.52989 | 0.076395  |
| GO:0010468 | regulation of gene expression                                                                                                                                                               | 0.52147 | 0.082079  |
| GO:0016712 | oxidoreductase activity, acting on paired donors, with incorporation or reduction of molecular oxygen, reduced flavin or flavoprotein as one donor, and incorporation of one atom of oxygen | 0.51349 | 0.087723  |
| GO:0042632 | cholesterol homeostasis                                                                                                                                                                     | 0.42903 | 0.16401   |
| rno00260   | Glycine, serine and threonine metabolism - Rattus norvegicus (rat)                                                                                                                          | 0.42228 | 0.17148   |
| GO:0005543 | phospholipid binding                                                                                                                                                                        | 0.42213 | 0.17164   |
| GO:0017144 | drug metabolic process                                                                                                                                                                      | 0.3894  | 0.21086   |
| GO:0009074 | aromatic amino acid family catabolic process                                                                                                                                                | 0.38713 | 0.21377   |
| GO:0010878 | cholesterol storage                                                                                                                                                                         | 0.37101 | 0.23511   |

| <b>Term id</b> | <b>Term name</b>                                               | <b>r</b> | <b>p</b> |
|----------------|----------------------------------------------------------------|----------|----------|
| GO:0006733     | oxidoreduction coenzyme metabolic process                      | 0.35745  | 0.25399  |
| GO:0072524     | pyridine-containing compound metabolic process                 | 0.33543  | 0.28649  |
| GO:0006958     | complement activation, classical pathway                       | 0.32982  | 0.29511  |
| GO:0030330     | DNA damage response, signal transduction by p53 class mediator | 0.32934  | 0.29586  |
| GO:0005615     | extracellular space                                            | 0.32401  | 0.30422  |
| GO:0009070     | serine family amino acid biosynthetic process                  | 0.32016  | 0.31032  |
| GO:0010043     | response to zinc ion                                           | 0.29252  | 0.35619  |
| GO:0072395     | signal transduction involved in cell cycle checkpoint          | -0.2679  | 0.39987  |
| GO:0009071     | serine family amino acid catabolic process                     | 0.16792  | 0.6019   |
| rno00051       | Fructose and mannose metabolism - Rattus norvegicus (rat)      | -0.10685 | 0.741    |
| GO:0006544     | glycine metabolic process                                      | 0.098647 | 0.76036  |
