# Supplementary material for: Model-based contextualization of in vitro toxicity data quantitatively predicts in vivo drug response in patients
Source: PubMed Central journal article supplement (PMC5306109; doi:10.1007/s00204-016-1723-x), 2016-05-09
Supplement: 204_2016_1723_MOESM3_ESM.pdf [file 204_2016_1723_MOESM3_ESM.pdf]

| Species | Sub ontology | Term ID    | Term name                                                               |
|---------|--------------|------------|-------------------------------------------------------------------------|
| Human   | BP           | GO:000070  | mitotic sister chromatid segregation                                    |
| Human   | BP           | GO:000075  | cell cycle checkpoint                                                   |
| Human   | BP           | GO:000079  | regulation of cyclin-dependent protein serine/threonine kinase activity |
| Human   | BP           | GO:000082  | G1/S transition of mitotic cell cycle                                   |
| Human   | BP           | GO:000226  | microtubule cytoskeleton organization                                   |
| Human   | BP           | GO:000278  | mitotic cell cycle                                                      |
| Human   | BP           | GO:000280  | nuclear division                                                        |
| Human   | BP           | GO:000723  | telomere maintenance                                                    |
| Human   | BP           | GO:000819  | sister chromatid segregation                                            |
| Human   | BP           | GO:0001702 | gastrulation with mouth forming second                                  |
| Human   | BP           | GO:0001889 | liver development                                                       |
| Human   | BP           | GO:0001932 | regulation of protein phosphorylation                                   |
| Human   | BP           | GO:0001933 | negative regulation of protein phosphorylation                          |
| Human   | BP           | GO:0003281 | ventricular septum development                                          |
| Human   | BP           | GO:0006082 | organic acid metabolic process                                          |
| Human   | BP           | GO:0006259 | DNA metabolic process                                                   |
| Human   | BP           | GO:0006260 | DNA replication                                                         |
| Human   | BP           | GO:0006261 | DNA-dependent DNA replication                                           |
| Human   | BP           | GO:0006281 | DNA repair                                                              |
| Human   | BP           | GO:0006310 | DNA recombination                                                       |
| Human   | BP           | GO:0006312 | mitotic recombination                                                   |
| Human   | BP           | GO:0006323 | DNA packaging                                                           |
| Human   | BP           | GO:0006333 | chromatin assembly or disassembly                                       |
| Human   | BP           | GO:0006334 | nucleosome assembly                                                     |
| Human   | BP           | GO:0006336 | DNA replication-independent nucleosome assembly                         |
| Human   | BP           | GO:0006338 | chromatin remodeling                                                    |
| Human   | BP           | GO:0006351 | transcription, DNA-templated                                            |
| Human   | BP           | GO:0006355 | regulation of transcription, DNA-templated                              |
| Human   | BP           | GO:0006357 | regulation of transcription from RNA polymerase II promoter             |
| Human   | BP           | GO:0006461 | protein complex assembly                                                |
| Human   | BP           | GO:0006464 | cellular protein modification process                                   |
| Human   | BP           | GO:0006468 | protein phosphorylation                                                 |
| Human   | BP           | GO:0006577 | amino-acid betaine metabolic process                                    |
| Human   | BP           | GO:0006793 | phosphorus metabolic process                                            |
| Human   | BP           | GO:0006796 | phosphate-containing compound metabolic process                         |
| Human   | BP           | GO:0006807 | nitrogen compound metabolic process                                     |
| Human   | BP           | GO:0006915 | apoptotic process                                                       |
| Human   | BP           | GO:0006950 | response to stress                                                      |
| Human   | BP           | GO:0006974 | cellular response to DNA damage stimulus                                |

| Species | Sub ontology | Term ID    | Term name                                             |
|---------|--------------|------------|-------------------------------------------------------|
| Human   | BP           | GO:0006984 | ER-nucleus signaling pathway                          |
| Human   | BP           | GO:0006986 | response to unfolded protein                          |
| Human   | BP           | GO:0006996 | organelle organization                                |
| Human   | BP           | GO:0007010 | cytoskeleton organization                             |
| Human   | BP           | GO:0007017 | microtubule-based process                             |
| Human   | BP           | GO:0007049 | cell cycle                                            |
| Human   | BP           | GO:0007051 | spindle organization                                  |
| Human   | BP           | GO:0007052 | mitotic spindle organization                          |
| Human   | BP           | GO:0007059 | chromosome segregation                                |
| Human   | BP           | GO:0007067 | mitotic nuclear division                              |
| Human   | BP           | GO:0007088 | regulation of mitosis                                 |
| Human   | BP           | GO:0007093 | mitotic cell cycle checkpoint                         |
| Human   | BP           | GO:0007126 | meiotic nuclear division                              |
| Human   | BP           | GO:0007127 | meiosis I                                             |
| Human   | BP           | GO:0007346 | regulation of mitotic cell cycle                      |
| Human   | BP           | GO:0008152 | metabolic process                                     |
| Human   | BP           | GO:0008219 | cell death                                            |
| Human   | BP           | GO:0009056 | catabolic process                                     |
| Human   | BP           | GO:0009058 | biosynthetic process                                  |
| Human   | BP           | GO:0009059 | macromolecule biosynthetic process                    |
| Human   | BP           | GO:0009063 | cellular amino acid catabolic process                 |
| Human   | BP           | GO:0009112 | nucleobase metabolic process                          |
| Human   | BP           | GO:0009123 | nucleoside monophosphate metabolic process            |
| Human   | BP           | GO:0009125 | nucleoside monophosphate catabolic process            |
| Human   | BP           | GO:0009128 | purine nucleoside monophosphate catabolic process     |
| Human   | BP           | GO:0009158 | ribonucleoside monophosphate catabolic process        |
| Human   | BP           | GO:0009169 | purine ribonucleoside monophosphate catabolic process |
| Human   | BP           | GO:0009262 | deoxyribonucleotide metabolic process                 |
| Human   | BP           | GO:0009263 | deoxyribonucleotide biosynthetic process              |
| Human   | BP           | GO:0009605 | response to external stimulus                         |
| Human   | BP           | GO:0009719 | response to endogenous stimulus                       |
| Human   | BP           | GO:0009889 | regulation of biosynthetic process                    |
| Human   | BP           | GO:0009891 | positive regulation of biosynthetic process           |
| Human   | BP           | GO:0009892 | negative regulation of metabolic process              |
| Human   | BP           | GO:0009893 | positive regulation of metabolic process              |
| Human   | BP           | GO:0009987 | cellular process                                      |
| Human   | BP           | GO:0009991 | response to extracellular stimulus                    |
| Human   | BP           | GO:0010033 | response to organic substance                         |
| Human   | BP           | GO:0010035 | response to inorganic substance                       |

| Species | Sub ontology | Term ID    | Term name                                                                                      |
|---------|--------------|------------|------------------------------------------------------------------------------------------------|
| Human   | BP           | GO:0010212 | response to ionizing radiation                                                                 |
| Human   | BP           | GO:0010468 | regulation of gene expression                                                                  |
| Human   | BP           | GO:0010556 | regulation of macromolecule biosynthetic process                                               |
| Human   | BP           | GO:0010557 | positive regulation of macromolecule biosynthetic process                                      |
| Human   | BP           | GO:0010564 | regulation of cell cycle process                                                               |
| Human   | BP           | GO:0010604 | positive regulation of macromolecule metabolic process                                         |
| Human   | BP           | GO:0010605 | negative regulation of macromolecule metabolic process                                         |
| Human   | BP           | GO:0010628 | positive regulation of gene expression                                                         |
| Human   | BP           | GO:0010639 | negative regulation of organelle organization                                                  |
| Human   | BP           | GO:0010833 | telomere maintenance via telomere lengthening                                                  |
| Human   | BP           | GO:0010941 | regulation of cell death                                                                       |
| Human   | BP           | GO:0010942 | positive regulation of cell death                                                              |
| Human   | BP           | GO:0010948 | negative regulation of cell cycle process                                                      |
| Human   | BP           | GO:0012501 | programmed cell death                                                                          |
| Human   | BP           | GO:0016043 | cellular component organization                                                                |
| Human   | BP           | GO:0016053 | organic acid biosynthetic process                                                              |
| Human   | BP           | GO:0016054 | organic acid catabolic process                                                                 |
| Human   | BP           | GO:0016265 | death                                                                                          |
| Human   | BP           | GO:0016310 | phosphorylation                                                                                |
| Human   | BP           | GO:0018130 | heterocycle biosynthetic process                                                               |
| Human   | BP           | GO:0019222 | regulation of metabolic process                                                                |
| Human   | BP           | GO:0019438 | aromatic compound biosynthetic process                                                         |
| Human   | BP           | GO:0019538 | protein metabolic process                                                                      |
| Human   | BP           | GO:0019752 | carboxylic acid metabolic process                                                              |
| Human   | BP           | GO:0022402 | cell cycle process                                                                             |
| Human   | BP           | GO:0022616 | DNA strand elongation                                                                          |
| Human   | BP           | GO:0030071 | regulation of mitotic metaphase/anaphase transition                                            |
| Human   | BP           | GO:0030261 | chromosome condensation                                                                        |
| Human   | BP           | GO:0030968 | endoplasmic reticulum unfolded protein response                                                |
| Human   | BP           | GO:0031055 | chromatin remodeling at centromere                                                             |
| Human   | BP           | GO:0031109 | microtubule polymerization or depolymerization                                                 |
| Human   | BP           | GO:0031145 | anaphase-promoting complex-dependent proteasomal ubiquitin-dependent protein catabolic process |
| Human   | BP           | GO:0031323 | regulation of cellular metabolic process                                                       |
| Human   | BP           | GO:0031324 | negative regulation of cellular metabolic process                                              |
| Human   | BP           | GO:0031325 | positive regulation of cellular metabolic process                                              |
| Human   | BP           | GO:0031326 | regulation of cellular biosynthetic process                                                    |
| Human   | BP           | GO:0031328 | positive regulation of cellular biosynthetic process                                           |
| Human   | BP           | GO:0031399 | regulation of protein modification process                                                     |
| Human   | BP           | GO:0031497 | chromatin assembly                                                                             |

| Species | Sub ontology | Term ID    | Term name                                                 |
|---------|--------------|------------|-----------------------------------------------------------|
| Human   | BP           | GO:0031577 | spindle checkpoint                                        |
| Human   | BP           | GO:0031667 | response to nutrient levels                               |
| Human   | BP           | GO:0032069 | regulation of nuclease activity                           |
| Human   | BP           | GO:0032075 | positive regulation of nuclease activity                  |
| Human   | BP           | GO:0032200 | telomere organization                                     |
| Human   | BP           | GO:0032268 | regulation of cellular protein metabolic process          |
| Human   | BP           | GO:0032269 | negative regulation of cellular protein metabolic process |
| Human   | BP           | GO:0032774 | RNA biosynthetic process                                  |
| Human   | BP           | GO:0032787 | monocarboxylic acid metabolic process                     |
| Human   | BP           | GO:0032886 | regulation of microtubule-based process                   |
| Human   | BP           | GO:0033043 | regulation of organelle organization                      |
| Human   | BP           | GO:0033260 | nuclear cell cycle DNA replication                        |
| Human   | BP           | GO:0033554 | cellular response to stress                               |
| Human   | BP           | GO:0034453 | microtubule anchoring                                     |
| Human   | BP           | GO:0034508 | centromere complex assembly                               |
| Human   | BP           | GO:0034620 | cellular response to unfolded protein                     |
| Human   | BP           | GO:0034641 | cellular nitrogen compound metabolic process              |
| Human   | BP           | GO:0034645 | cellular macromolecule biosynthetic process               |
| Human   | BP           | GO:0034654 | nucleobase-containing compound biosynthetic process       |
| Human   | BP           | GO:0034724 | DNA replication-independent nucleosome organization       |
| Human   | BP           | GO:0034728 | nucleosome organization                                   |
| Human   | BP           | GO:0034976 | response to endoplasmic reticulum stress                  |
| Human   | BP           | GO:0035556 | intracellular signal transduction                         |
| Human   | BP           | GO:0035825 | reciprocal DNA recombination                              |
| Human   | BP           | GO:0035966 | response to topologically incorrect protein               |
| Human   | BP           | GO:0035967 | cellular response to topologically incorrect protein      |
| Human   | BP           | GO:0036211 | protein modification process                              |
| Human   | BP           | GO:0042127 | regulation of cell proliferation                          |
| Human   | BP           | GO:0042221 | response to chemical                                      |
| Human   | BP           | GO:0042325 | regulation of phosphorylation                             |
| Human   | BP           | GO:0042326 | negative regulation of phosphorylation                    |
| Human   | BP           | GO:0042542 | response to hydrogen peroxide                             |
| Human   | BP           | GO:0042592 | homeostatic process                                       |
| Human   | BP           | GO:0042981 | regulation of apoptotic process                           |
| Human   | BP           | GO:0043044 | ATP-dependent chromatin remodeling                        |
| Human   | BP           | GO:0043067 | regulation of programmed cell death                       |
| Human   | BP           | GO:0043068 | positive regulation of programmed cell death              |
| Human   | BP           | GO:0043086 | negative regulation of catalytic activity                 |
| Human   | BP           | GO:0043170 | macromolecule metabolic process                           |

| Species | Sub ontology | Term ID    | Term name                                                               |
|---------|--------------|------------|-------------------------------------------------------------------------|
| Human   | BP           | GO:0043412 | macromolecule modification                                              |
| Human   | BP           | GO:0043436 | oxoacid metabolic process                                               |
| Human   | BP           | GO:0043486 | histone exchange                                                        |
| Human   | BP           | GO:0043549 | regulation of kinase activity                                           |
| Human   | BP           | GO:0043933 | macromolecular complex subunit organization                             |
| Human   | BP           | GO:0044237 | cellular metabolic process                                              |
| Human   | BP           | GO:0044238 | primary metabolic process                                               |
| Human   | BP           | GO:0044248 | cellular catabolic process                                              |
| Human   | BP           | GO:0044249 | cellular biosynthetic process                                           |
| Human   | BP           | GO:0044260 | cellular macromolecule metabolic process                                |
| Human   | BP           | GO:0044267 | cellular protein metabolic process                                      |
| Human   | BP           | GO:0044271 | cellular nitrogen compound biosynthetic process                         |
| Human   | BP           | GO:0044281 | small molecule metabolic process                                        |
| Human   | BP           | GO:0044282 | small molecule catabolic process                                        |
| Human   | BP           | GO:0044283 | small molecule biosynthetic process                                     |
| Human   | BP           | GO:0044699 | single-organism process                                                 |
| Human   | BP           | GO:0044710 | single-organism metabolic process                                       |
| Human   | BP           | GO:0044711 | single-organism biosynthetic process                                    |
| Human   | BP           | GO:0044712 | single-organism catabolic process                                       |
| Human   | BP           | GO:0044763 | single-organism cellular process                                        |
| Human   | BP           | GO:0044770 | cell cycle phase transition                                             |
| Human   | BP           | GO:0044772 | mitotic cell cycle phase transition                                     |
| Human   | BP           | GO:0044784 | metaphase/anaphase transition of cell cycle                             |
| Human   | BP           | GO:0044786 | cell cycle DNA replication                                              |
| Human   | BP           | GO:0044839 | cell cycle G2/M phase transition                                        |
| Human   | BP           | GO:0044843 | cell cycle G1/S phase transition                                        |
| Human   | BP           | GO:0045185 | maintenance of protein location                                         |
| Human   | BP           | GO:0045786 | negative regulation of cell cycle                                       |
| Human   | BP           | GO:0045787 | positive regulation of cell cycle                                       |
| Human   | BP           | GO:0045839 | negative regulation of mitosis                                          |
| Human   | BP           | GO:0045841 | negative regulation of mitotic metaphase/anaphase transition            |
| Human   | BP           | GO:0045859 | regulation of protein kinase activity                                   |
| Human   | BP           | GO:0045893 | positive regulation of transcription, DNA-templated                     |
| Human   | BP           | GO:0045935 | positive regulation of nucleobase-containing compound metabolic process |
| Human   | BP           | GO:0046395 | carboxylic acid catabolic process                                       |
| Human   | BP           | GO:0046483 | heterocycle metabolic process                                           |
| Human   | BP           | GO:0048285 | organelle fission                                                       |
| Human   | BP           | GO:0048518 | positive regulation of biological process                               |
| Human   | BP           | GO:0048519 | negative regulation of biological process                               |

| Species | Sub ontology | Term ID    | Term name                                                  |
|---------|--------------|------------|------------------------------------------------------------|
| Human   | BP           | GO:0048522 | positive regulation of cellular process                    |
| Human   | BP           | GO:0048523 | negative regulation of cellular process                    |
| Human   | BP           | GO:0048660 | regulation of smooth muscle cell proliferation             |
| Human   | BP           | GO:0050000 | chromosome localization                                    |
| Human   | BP           | GO:0050789 | regulation of biological process                           |
| Human   | BP           | GO:0050790 | regulation of catalytic activity                           |
| Human   | BP           | GO:0050794 | regulation of cellular process                             |
| Human   | BP           | GO:0050896 | response to stimulus                                       |
| Human   | BP           | GO:0051129 | negative regulation of cellular component organization     |
| Human   | BP           | GO:0051171 | regulation of nitrogen compound metabolic process          |
| Human   | BP           | GO:0051173 | positive regulation of nitrogen compound metabolic process |
| Human   | BP           | GO:0051225 | spindle assembly                                           |
| Human   | BP           | GO:0051235 | maintenance of location                                    |
| Human   | BP           | GO:0051246 | regulation of protein metabolic process                    |
| Human   | BP           | GO:0051248 | negative regulation of protein metabolic process           |
| Human   | BP           | GO:0051252 | regulation of RNA metabolic process                        |
| Human   | BP           | GO:0051254 | positive regulation of RNA metabolic process               |
| Human   | BP           | GO:0051276 | chromosome organization                                    |
| Human   | BP           | GO:0051293 | establishment of spindle localization                      |
| Human   | BP           | GO:0051299 | centrosome separation                                      |
| Human   | BP           | GO:0051301 | cell division                                              |
| Human   | BP           | GO:0051302 | regulation of cell division                                |
| Human   | BP           | GO:0051303 | establishment of chromosome localization                   |
| Human   | BP           | GO:0051310 | metaphase plate congression                                |
| Human   | BP           | GO:0051321 | meiotic cell cycle                                         |
| Human   | BP           | GO:0051338 | regulation of transferase activity                         |
| Human   | BP           | GO:0051383 | kinetochore organization                                   |
| Human   | BP           | GO:0051493 | regulation of cytoskeleton organization                    |
| Human   | BP           | GO:0051640 | organelle localization                                     |
| Human   | BP           | GO:0051716 | cellular response to stimulus                              |
| Human   | BP           | GO:0051726 | regulation of cell cycle                                   |
| Human   | BP           | GO:0051783 | regulation of nuclear division                             |
| Human   | BP           | GO:0051784 | negative regulation of nuclear division                    |
| Human   | BP           | GO:0051983 | regulation of chromosome segregation                       |
| Human   | BP           | GO:0060255 | regulation of macromolecule metabolic process              |
| Human   | BP           | GO:0061008 | hepaticobiliary system development                         |
| Human   | BP           | GO:0061641 | CENP-A containing chromatin organization                   |
| Human   | BP           | GO:0065003 | macromolecular complex assembly                            |
| Human   | BP           | GO:0065004 | protein-DNA complex assembly                               |

| Species | Sub ontology | Term ID    | Term name                                                          |
|---------|--------------|------------|--------------------------------------------------------------------|
| Human   | BP           | GO:0065007 | biological regulation                                              |
| Human   | BP           | GO:0065008 | regulation of biological quality                                   |
| Human   | BP           | GO:0065009 | regulation of molecular function                                   |
| Human   | BP           | GO:0070271 | protein complex biogenesis                                         |
| Human   | BP           | GO:0070507 | regulation of microtubule cytoskeleton organization                |
| Human   | BP           | GO:0070887 | cellular response to chemical stimulus                             |
| Human   | BP           | GO:0071103 | DNA conformation change                                            |
| Human   | BP           | GO:0071173 | spindle assembly checkpoint                                        |
| Human   | BP           | GO:0071174 | mitotic spindle checkpoint                                         |
| Human   | BP           | GO:0071310 | cellular response to organic substance                             |
| Human   | BP           | GO:0071704 | organic substance metabolic process                                |
| Human   | BP           | GO:0071822 | protein complex subunit organization                               |
| Human   | BP           | GO:0071824 | protein-DNA complex subunit organization                           |
| Human   | BP           | GO:0071840 | cellular component organization or biogenesis                      |
| Human   | BP           | GO:0071900 | regulation of protein serine/threonine kinase activity             |
| Human   | BP           | GO:0071901 | negative regulation of protein serine/threonine kinase activity    |
| Human   | BP           | GO:0072527 | pyrimidine-containing compound metabolic process                   |
| Human   | BP           | GO:0080090 | regulation of primary metabolic process                            |
| Human   | BP           | GO:0090224 | regulation of spindle organization                                 |
| Human   | BP           | GO:1901342 | regulation of vasculature development                              |
| Human   | BP           | GO:1901360 | organic cyclic compound metabolic process                          |
| Human   | BP           | GO:1901362 | organic cyclic compound biosynthetic process                       |
| Human   | BP           | GO:1901564 | organonitrogen compound metabolic process                          |
| Human   | BP           | GO:1901565 | organonitrogen compound catabolic process                          |
| Human   | BP           | GO:1901575 | organic substance catabolic process                                |
| Human   | BP           | GO:1901576 | organic substance biosynthetic process                             |
| Human   | BP           | GO:1901605 | alpha-amino acid metabolic process                                 |
| Human   | BP           | GO:1901987 | regulation of cell cycle phase transition                          |
| Human   | BP           | GO:1901988 | negative regulation of cell cycle phase transition                 |
| Human   | BP           | GO:1901990 | regulation of mitotic cell cycle phase transition                  |
| Human   | BP           | GO:1901991 | negative regulation of mitotic cell cycle phase transition         |
| Human   | BP           | GO:1902099 | regulation of metaphase/anaphase transition of cell cycle          |
| Human   | BP           | GO:1902100 | negative regulation of metaphase/anaphase transition of cell cycle |
| Human   | BP           | GO:1902589 | single-organism organelle organization                             |
| Human   | BP           | GO:1902680 | positive regulation of RNA biosynthetic process                    |
| Human   | BP           | GO:1902850 | microtubule cytoskeleton organization involved in mitosis          |
| Human   | BP           | GO:1903046 | meiotic cell cycle process                                         |
| Human   | BP           | GO:1903047 | mitotic cell cycle process                                         |
| Human   | BP           | GO:2000112 | regulation of cellular macromolecule biosynthetic process          |

| Species | Sub ontology | Term ID    | Term name                                                           |
|---------|--------------|------------|---------------------------------------------------------------------|
| Human   | BP           | GO:2001141 | regulation of RNA biosynthetic process                              |
| Human   | MF           | GO:0000166 | nucleotide binding                                                  |
| Human   | MF           | GO:0001882 | nucleoside binding                                                  |
| Human   | MF           | GO:0001883 | purine nucleoside binding                                           |
| Human   | MF           | GO:0003690 | double-stranded DNA binding                                         |
| Human   | MF           | GO:0003824 | catalytic activity                                                  |
| Human   | MF           | GO:0004860 | protein kinase inhibitor activity                                   |
| Human   | MF           | GO:0005515 | protein binding                                                     |
| Human   | MF           | GO:0015631 | tubulin binding                                                     |
| Human   | MF           | GO:0016491 | oxidoreductase activity                                             |
| Human   | MF           | GO:0016538 | cyclin-dependent protein serine/threonine kinase regulator activity |
| Human   | MF           | GO:0016887 | ATPase activity                                                     |
| Human   | MF           | GO:0017076 | purine nucleotide binding                                           |
| Human   | MF           | GO:0019207 | kinase regulator activity                                           |
| Human   | MF           | GO:0019210 | kinase inhibitor activity                                           |
| Human   | MF           | GO:0019887 | protein kinase regulator activity                                   |
| Human   | MF           | GO:0030291 | protein serine/threonine kinase inhibitor activity                  |
| Human   | MF           | GO:0030554 | adenyl nucleotide binding                                           |
| Human   | MF           | GO:0032404 | mismatch repair complex binding                                     |
| Human   | MF           | GO:0032549 | ribonucleoside binding                                              |
| Human   | MF           | GO:0032550 | purine ribonucleoside binding                                       |
| Human   | MF           | GO:0032553 | ribonucleotide binding                                              |
| Human   | MF           | GO:0032555 | purine ribonucleotide binding                                       |
| Human   | MF           | GO:0032559 | adenyl ribonucleotide binding                                       |
| Human   | MF           | GO:0035173 | histone kinase activity                                             |
| Human   | MF           | GO:0035639 | purine ribonucleoside triphosphate binding                          |
| Human   | MF           | GO:0036094 | small molecule binding                                              |
| Human   | MF           | GO:0043168 | anion binding                                                       |
| Human   | MF           | GO:0043566 | structure-specific DNA binding                                      |
| Human   | MF           | GO:0097367 | carbohydrate derivative binding                                     |
| Human   | MF           | GO:1901265 | nucleoside phosphate binding                                        |
| Human   | CC           | GO:0000228 | nuclear chromosome                                                  |
| Human   | CC           | GO:0000775 | chromosome, centromeric region                                      |
| Human   | CC           | GO:0000776 | kinetochore                                                         |
| Human   | CC           | GO:0000777 | condensed chromosome kinetochore                                    |
| Human   | CC           | GO:0000779 | condensed chromosome, centromeric region                            |
| Human   | CC           | GO:0000780 | condensed nuclear chromosome, centromeric region                    |
| Human   | CC           | GO:0000793 | condensed chromosome                                                |
| Human   | CC           | GO:0000794 | condensed nuclear chromosome                                        |



| Species | Sub ontology | Term ID    | Term name                                    |
|---------|--------------|------------|----------------------------------------------|
| Human   | CC           | GO:0005622 | intracellular                                |
| Human   | CC           | GO:0005623 | cell                                         |
| Human   | CC           | GO:0005634 | nucleus                                      |
| Human   | CC           | GO:0005657 | replication fork                             |
| Human   | CC           | GO:0005694 | chromosome                                   |
| Human   | CC           | GO:0005737 | cytoplasm                                    |
| Human   | CC           | GO:0005783 | endoplasmic reticulum                        |
| Human   | CC           | GO:0005815 | microtubule organizing center                |
| Human   | CC           | GO:0005819 | spindle                                      |
| Human   | CC           | GO:0005856 | cytoskeleton                                 |
| Human   | CC           | GO:0005874 | microtubule                                  |
| Human   | CC           | GO:0005875 | microtubule associated complex               |
| Human   | CC           | GO:0015630 | microtubule cytoskeleton                     |
| Human   | CC           | GO:0031974 | membrane-enclosed lumen                      |
| Human   | CC           | GO:0031981 | nuclear lumen                                |
| Human   | CC           | GO:0031988 | membrane-bounded vesicle                     |
| Human   | CC           | GO:0032153 | cell division site                           |
| Human   | CC           | GO:0043226 | organelle                                    |
| Human   | CC           | GO:0043227 | membrane-bounded organelle                   |
| Human   | CC           | GO:0043228 | non-membrane-bounded organelle               |
| Human   | CC           | GO:0043229 | intracellular organelle                      |
| Human   | CC           | GO:0043230 | extracellular organelle                      |
| Human   | CC           | GO:0043231 | intracellular membrane-bounded organelle     |
| Human   | CC           | GO:0043232 | intracellular non-membrane-bounded organelle |
| Human   | CC           | GO:0043233 | organelle lumen                              |
| Human   | CC           | GO:0044421 | extracellular region part                    |
| Human   | CC           | GO:0044422 | organelle part                               |
| Human   | CC           | GO:0044424 | intracellular part                           |
| Human   | CC           | GO:0044427 | chromosomal part                             |
| Human   | CC           | GO:0044428 | nuclear part                                 |
| Human   | CC           | GO:0044430 | cytoskeletal part                            |
| Human   | CC           | GO:0044432 | endoplasmic reticulum part                   |
| Human   | CC           | GO:0044444 | cytoplasmic part                             |
| Human   | CC           | GO:0044446 | intracellular organelle part                 |
| Human   | CC           | GO:0044454 | nuclear chromosome part                      |
| Human   | CC           | GO:0044464 | cell part                                    |
| Human   | CC           | GO:0044815 | DNA packaging complex                        |
| Human   | CC           | GO:0065010 | extracellular membrane-bounded organelle     |
| Human   | CC           | GO:0070013 | intracellular organelle lumen                |



| Species | Sub ontology | Term ID    | Term name                                        |
|---------|--------------|------------|--------------------------------------------------|
| Rat     | BP           | GO:0005996 | monosaccharide metabolic process                 |
| Rat     | BP           | GO:0006066 | alcohol metabolic process                        |
| Rat     | BP           | GO:0006082 | organic acid metabolic process                   |
| Rat     | BP           | GO:0006520 | cellular amino acid metabolic process            |
| Rat     | BP           | GO:0006629 | lipid metabolic process                          |
| Rat     | BP           | GO:0006694 | steroid biosynthetic process                     |
| Rat     | BP           | GO:0006725 | cellular aromatic compound metabolic process     |
| Rat     | BP           | GO:0006732 | coenzyme metabolic process                       |
| Rat     | BP           | GO:0006950 | response to stress                               |
| Rat     | BP           | GO:0006956 | complement activation                            |
| Rat     | BP           | GO:0008152 | metabolic process                                |
| Rat     | BP           | GO:0008202 | steroid metabolic process                        |
| Rat     | BP           | GO:0008203 | cholesterol metabolic process                    |
| Rat     | BP           | GO:0008652 | cellular amino acid biosynthetic process         |
| Rat     | BP           | GO:0009056 | catabolic process                                |
| Rat     | BP           | GO:0009063 | cellular amino acid catabolic process            |
| Rat     | BP           | GO:0009069 | serine family amino acid metabolic process       |
| Rat     | BP           | GO:0009410 | response to xenobiotic stimulus                  |
| Rat     | BP           | GO:0009725 | response to hormone                              |
| Rat     | BP           | GO:0009889 | regulation of biosynthetic process               |
| Rat     | BP           | GO:0010556 | regulation of macromolecule biosynthetic process |
| Rat     | BP           | GO:0016052 | carbohydrate catabolic process                   |
| Rat     | BP           | GO:0016053 | organic acid biosynthetic process                |
| Rat     | BP           | GO:0016054 | organic acid catabolic process                   |
| Rat     | BP           | GO:0016125 | sterol metabolic process                         |
| Rat     | BP           | GO:0016126 | sterol biosynthetic process                      |
| Rat     | BP           | GO:0019222 | regulation of metabolic process                  |
| Rat     | BP           | GO:0019318 | hexose metabolic process                         |
| Rat     | BP           | GO:0019752 | carboxylic acid metabolic process                |
| Rat     | BP           | GO:0031323 | regulation of cellular metabolic process         |
| Rat     | BP           | GO:0033554 | cellular response to stress                      |
| Rat     | BP           | GO:0043436 | oxoacid metabolic process                        |
| Rat     | BP           | GO:0044237 | cellular metabolic process                       |
| Rat     | BP           | GO:0044238 | primary metabolic process                        |
| Rat     | BP           | GO:0044248 | cellular catabolic process                       |
| Rat     | BP           | GO:0044281 | small molecule metabolic process                 |
| Rat     | BP           | GO:0044282 | small molecule catabolic process                 |
| Rat     | BP           | GO:0044283 | small molecule biosynthetic process              |
| Rat     | BP           | GO:0044710 | single-organism metabolic process                |

| Species | Sub ontology | Term ID    | Term name                                                                                             |
|---------|--------------|------------|-------------------------------------------------------------------------------------------------------|
| Rat     | BP           | GO:0044711 | single-organism biosynthetic process                                                                  |
| Rat     | BP           | GO:0044712 | single-organism catabolic process                                                                     |
| Rat     | BP           | GO:0046394 | carboxylic acid biosynthetic process                                                                  |
| Rat     | BP           | GO:0046395 | carboxylic acid catabolic process                                                                     |
| Rat     | BP           | GO:0046483 | heterocycle metabolic process                                                                         |
| Rat     | BP           | GO:0050789 | regulation of biological process                                                                      |
| Rat     | BP           | GO:0050794 | regulation of cellular process                                                                        |
| Rat     | BP           | GO:0051171 | regulation of nitrogen compound metabolic process                                                     |
| Rat     | BP           | GO:0051186 | cofactor metabolic process                                                                            |
| Rat     | BP           | GO:0055088 | lipid homeostasis                                                                                     |
| Rat     | BP           | GO:0055092 | sterol homeostasis                                                                                    |
| Rat     | BP           | GO:0061008 | hepaticobiliary system development                                                                    |
| Rat     | BP           | GO:0071466 | cellular response to xenobiotic stimulus                                                              |
| Rat     | BP           | GO:0071704 | organic substance metabolic process                                                                   |
| Rat     | BP           | GO:0072331 | signal transduction by p53 class mediator                                                             |
| Rat     | BP           | GO:0072376 | protein activation cascade                                                                            |
| Rat     | BP           | GO:0080090 | regulation of primary metabolic process                                                               |
| Rat     | BP           | GO:1901360 | organic cyclic compound metabolic process                                                             |
| Rat     | BP           | GO:1901564 | organonitrogen compound metabolic process                                                             |
| Rat     | BP           | GO:1901575 | organic substance catabolic process                                                                   |
| Rat     | BP           | GO:1901605 | alpha-amino acid metabolic process                                                                    |
| Rat     | BP           | GO:1901606 | alpha-amino acid catabolic process                                                                    |
| Rat     | BP           | GO:1901615 | organic hydroxy compound metabolic process                                                            |
| Rat     | BP           | GO:1901652 | response to peptide                                                                                   |
| Rat     | BP           | GO:1901700 | response to oxygen-containing compound                                                                |
| Rat     | CC           | GO:0005576 | extracellular region                                                                                  |
| Rat     | CC           | GO:0005622 | intracellular                                                                                         |
| Rat     | CC           | GO:0031982 | vesicle                                                                                               |
| Rat     | CC           | GO:0031988 | membrane-bounded vesicle                                                                              |
| Rat     | CC           | GO:0043226 | organelle                                                                                             |
| Rat     | CC           | GO:0043227 | membrane-bounded organelle                                                                            |
| Rat     | CC           | GO:0043230 | extracellular organelle                                                                               |
| Rat     | CC           | GO:0044421 | extracellular region part                                                                             |
| Rat     | CC           | GO:0044424 | intracellular part                                                                                    |
| Rat     | CC           | GO:0065010 | extracellular membrane-bounded organelle                                                              |
| Rat     | MF           | GO:0003824 | catalytic activity                                                                                    |
| Rat     | MF           | GO:0004497 | monooxygenase activity                                                                                |
| Rat     | MF           | GO:0016491 | oxidoreductase activity                                                                               |
| Rat     | MF           | GO:0016705 | oxidoreductase activity, acting on paired donors, with incorporation or reduction of molecular oxygen |

| <b>Species</b> | <b>Sub ontology</b> | <b>Term ID</b> | <b>Term name</b> |
|----------------|---------------------|----------------|------------------|
| Rat            | MF                  | GO:0043168     | anion binding    |
| Rat            | MF                  | GO:0048037     | cofactor binding |
| Rat            | MF                  | GO:0050662     | coenzyme binding |
